# Supplementary material
Source: PubMed Central journal article supplement (PMC9641662)
Supplement: NIHMS1844699-supplement-SI.pdf [file NIHMS1844699-supplement-SI.pdf]

Supporting Information

**An Oxygen-Tolerant PET-RAFT Polymerization for Screening Structure–Activity Relationships**

*Adam J. Gormley, Jonathan Yeow, Gervase Ng, Órla Conway, Cyrille Boyer,\* and Robert Chapman\**

anie\_201711044\_sm\_miscellaneous\_information.pdf

## **Author Contributions**

J.Y. Investigation: Supporting

G.N. Investigation: Supporting

Ó.C. Investigation: Supporting

R.C. co-corresponding author: Equal.

# Supporting Information

---

## Experimental Procedures

### Materials:

The RAFT agent 4-cyano-4-[(dodecylsulfanylthiocarbonyl)sulfanyl]pentanoic acid (CDTPA, **R1**) was purchased from Boron Scientific and used as supplied. *S*-benzyl *S'*-propionic acid trithiocarbonate (BSPA, **R2**), was synthesised according to literature procedures and isolated as a yellow solid.<sup>1</sup> With the exception of NHS acrylate (which was synthesised, see below), all monomers were purchased from Sigma Aldrich and deinhibited prior to use by passing them over MEHQ inhibitor removal resin. 1,3,4,6-tetra-*O*-acetyl-2-azido-2-deoxy- $\alpha$ -D-mannopyranose (Man(OAc)-N<sub>3</sub>) was purchased from Carbosynth (UK). Zinc tetraphenylporphyrin and all other reagents, including the *concanavalin A* – *horseradish peroxidase* conjugate, were purchased from Sigma Aldrich and used as supplied.

### Synthesis of N-hydroxysuccinimide (NHS) acrylate (1):

*N*-hydroxysuccinimide (3.0 g, 26.1 mmol) was mixed with triethylamine (2.9 g, 28.7 mmol) in anhydrous dichloromethane (50 mL) under an inert atmosphere. The solution was cooled in an ice bath and acryloyl chloride (2.6 g, 28.7 mmol) was added dropwise. After stirring overnight the mixture was washed with HCl (0.1M, 2 x 50 mL), water (1 x 50 mL) and brine (1 x 50 mL), dried with MgSO<sub>4</sub>, and concentrated *in vacuo*. The crude was purified by column chromatography over silica (25-50% ethyl acetate / hexane), to yield the product as a white solid (2.75 g, 63%), <sup>1</sup>H-NMR (400 MHz, CDCl<sub>3</sub>)  $\delta$  ppm: 6.70 (dd, *J* = 17.3, 0.9 Hz, 1H), 6.32 (dd, *J* = 17.3, 10.7 Hz, 1H), 6.17 (dd, *J* = 10.7, 0.9 Hz, 1H), 2.86 (s, 4H). <sup>13</sup>C-NMR (101 MHz, CDCl<sub>3</sub>)  $\delta$  ppm: 169.16, 161.17, 136.33, 123.07, 25.74.

---

<sup>1</sup> M. H. Stenzel, T. P. Davis, A. G. Fane, *J. Mater. Chem.* **2003**, *13*, 2090–2097.

**Synthesis of 3 arm RAFT agent, R3:**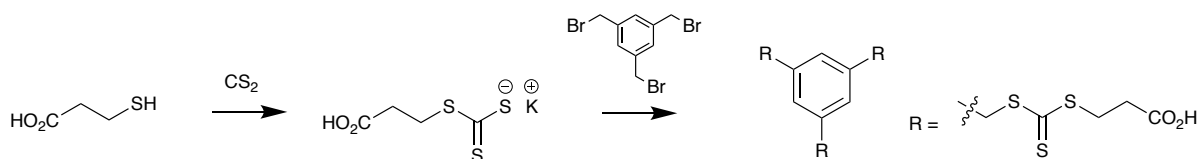

The three arm RAFT agent (**R3**) was prepared following a procedure adapted from the literature.<sup>2</sup> 3-mercaptopropionic acid (1.0 g, 9.4 mmol) was dissolved in acetone (20 mL) with tribasic potassium phosphate (2.0 g, 9.4 mmol). The mixture was cooled in an ice bath and Carbon disulphide (1.0 mL, 17.1 mmol) was added dropwise. After 20 min stirring at RT, 1,3,5-trisubstituted benzene (0.66 g, 1.9 mmol) was added and the mixture was stirred for 2 h at RT. The solution was filtered and the yellow precipitate was dissolved in water and recrystallized by dropwise acidification of the solution with HCl. After filtration the solid was washed with water to yield the product (0.961 g, 78%). <sup>1</sup>H-NMR (400 MHz, DMSO-*d*<sub>6</sub>) δppm: 7.32 (s, 3H, Ph-H), 4.63 (s, 7H, Ph-CH<sub>2</sub>-), 3.53 (t, *J* = 6.9 Hz, 6H, S-CH<sub>2</sub>-), 2.67 (t, *J* = 6.9 Hz, 6H, -CH<sub>2</sub>-CO<sub>2</sub>H). <sup>13</sup>C-NMR (101 MHz, DMSO-*d*<sub>6</sub>) δppm: 172.92 (CO<sub>2</sub>H), 136.71 (Ph), 129.75 (Ph), 32.87 (S-CH<sub>2</sub>), 32.32 (CH<sub>2</sub>-CO<sub>2</sub>H).

**Synthesis of 4 arm RAFT agent, R4:**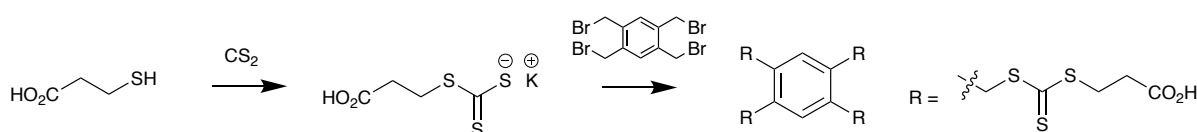

The four arm RAFT agent (**R4**) was prepared in following a similar methodology. 3-mercaptopropionic acid (1.0 g, 9.4 mmol) was dissolved in acetone (20 mL) with tribasic potassium phosphate (2.0 g, 9.4 mmol). The mixture was cooled in an ice bath and carbon disulphide (1.0 mL, 17.1 mmol) was added dropwise. After 20 min stirring at RT, 1,2,4,5-tetrabromomethyl benzene (0.63 g, 1.4 mmol) was added and the mixture was stirred for 2 h at RT. The solution was filtered, the yellow precipitate dissolved in isopropyl alcohol / dichloromethane (1:9 v/v, 100 mL), and the organic layers washed with HCl (0.1M, 3 x 50 mL), and then brine (1 x 50 mL). The organic fractions were dried with MgSO<sub>4</sub> and concentrated *in vacuo* to yield the product as a yellow solid (1.153 g, 97%). <sup>1</sup>H-NMR (400 MHz, DMSO-*d*<sub>6</sub>) δppm: 7.50 (s, 2H, Ph-H), 4.69 (s, 8H, Ph-CH<sub>2</sub>-), 3.52 (t, *J* = 6.9 Hz, 8H, S-CH<sub>2</sub>-), 2.64 (t, *J* = 6.8 Hz, 8H, -CH<sub>2</sub>-CO<sub>2</sub>H). <sup>13</sup>C-NMR (101 MHz, DMSO-*d*<sub>6</sub>) δppm: 173.09 (CO<sub>2</sub>H), 134.39 (Ph), 133.74 (Ph), 37.97 (Ph-CH<sub>2</sub>), 33.28 (S-CH<sub>2</sub>), 32.70 (CH<sub>2</sub>-CO<sub>2</sub>H).

**Measurement of polymerisation kinetics by near infrared (NIR) spectroscopy:**

NIR kinetics were run on 1 mL of reaction mixture, prepared from the same solutions as above, in a 2 mm quartz cuvette. Where the sample was degassed, this was done by bubbling the sample with nitrogen through a rubber septum. The cuvette was irradiated as above, and removed from the light source at each time point to run an NIR spectrum. Conversion was determined by monitoring the decrease in area of the peak from the vinyl group at 6000-6020 cm<sup>-1</sup>.

**Synthesis of mannose acrylamide for enzyme linked lectin binding assay:**

Sulfuric acid (98%, 3 drops) was added to a suspension of D-mannose (5.00 g, 0.028 mol) and acetic anhydride (28.39 g, 0.28 mol) over ice. After 1 h at 0 °C and then 3 h at room temperature, the clear mixture was diluted with water (100 mL), extracted with dichloromethane and washed with water (3 x 100 mL), sat. NaHCO<sub>3</sub> (1 x 100 mL), and brine (1 x 100 mL). The organic layers were dried over MgSO<sub>4</sub> and concentrated *in vacuo* to yield mannose (OAc) as off-white solid (9.69 g, 0.025 mol, 89.4%).

The protected mannose (5.2 g, 13.3 mmol) and N-hydroxyethyl acrylamide (1.84 g, 16.0 mmol) were then dissolved in anhydrous dichloromethane (50 mL) under a N<sup>2</sup> atmosphere. Anhydrous BF<sub>3</sub>(OEt)<sub>2</sub> (8.2 mL, 9.45 g, 66.5 mmol) was added dropwise and the reaction mixture was left stirring overnight at room temperature. The resultant suspension was filtered into ice-cold water (100 mL) and extracted using dichloromethane. The extract was then washed with NaHCO<sub>3</sub> (100 mL) and water (3 x 100 mL), dried over MgSO<sub>4</sub> and concentrated *in vacuo*. The crude was purified by silica chromatography using chloroform/acetone/methanol with a ratio of 7:2:1 (v/v) as the eluent, yielding the product as a pale yellow oil (2.26 g, 38%). <sup>1</sup>H-NMR (400 MHz, CDCl<sub>3</sub>) δ ppm: 6.30 (dd, *J* = 17.0, 1.6 Hz, 1H), 6.15 (dd, *J* = 17.0, 10.2 Hz, 1H), 5.67 (dd, *J* = 10.2, 1.6 Hz, 1H), 5.36 – 5.20 (m, 3H), 4.81 (s, 1H), 4.29 – 4.20 (m, 1H), 4.10 (dd, *J* = 12.2, 2.5 Hz, 1H), 3.96 (ddd, *J* = 9.9, 5.7, 2.5 Hz, 1H), 3.85 – 3.77 (m, 1H), 3.68 – 3.43 (m, 3H), 2.14 (s, 3H), 2.08 (s, 3H), 2.04 (s, 3H), 1.99 (s, 3H). <sup>13</sup>C-NMR (101 MHz, CDCl<sub>3</sub>) δ ppm: 170.65, 170.09, 169.68, 165.63, 130.53, 126.94, 97.75, 69.35, 68.99, 68.77, 67.55, 66.14, 62.50, 39.13, 20.86, 20.70.

<sup>2</sup> K. Belal, S. Poitras-Jolicoeur, J. Lyskaw, G. Pembouong, G. Cooke, P. Woisel, F. Stoffelbach; *Chem. Commun.*, **2016**, 52, 1847,

To remove the acetyl groups protected mannose acrylamide was dissolved in methanol and NaCO<sub>3</sub> (0.5 eq. / mannose) was added. The mixture was stirred for 15 min, after which the solution was filtered, washed with methanol, and concentrated in vacuo to yield the product as a white solid (1.042 g, 74%). <sup>1</sup>H-NMR (400 MHz, DMSO-*d*<sub>6</sub>) δ ppm: 6.24 (dd, *J* = 17.0, 10.1 Hz, 1H), 6.07 (dd, *J* = 17.1, 2.3 Hz, 1H), 5.57 (dd, *J* = 10.1, 2.3 Hz, 1H), 4.62 (s, 1H), 3.70 – 3.54 (m, 2H), 3.54 – 3.22 (m, 1H), 2.55 – 2.45 (m, 1H). <sup>13</sup>C-NMR (101 MHz, DMSO- *d*<sub>6</sub>) δ ppm: 165.12, 132.14, 125.55, 100.45, 74.48, 71.35, 70.68, 67.43, 65.81, 61.67, 49.03.

**Characterisation:**

NMR spectroscopy was performed using a Bruker Advance III 400 (400.13 MHz, 1H; 75.5 MHz, 13C) or an Advance III 600 (600.13 MHz, 1H; 150 MHz, 13C) with a 5 mm BBFO probe. Spectra were processed using the Bruker TOPSPIN 3.0 and MestReNova 11.0 software.

Gel permeation chromatography (GPC) was performed using *N,N*-dimethylformamide (DMF) + 0.01 % (w/v) LiBr as the eluent on a Shimadzu modular system comprising an auto injector and a differential refractive index detector. Three phenomenex 5.0 μm bead-size columns (10<sup>5</sup>, 10<sup>4</sup> and 10<sup>3</sup> Å) were used for separation, and all samples were filtered (0.45 μm PTFE) prior to injection. Molecular weights were estimated relative to narrow molecular weight distribution poly(methyl methacrylate) (100 to 1 x 10<sup>6</sup> g.mol<sup>-1</sup>) calibration standards without Mark-Houwink correction.

Matrix assisted laser desorption / ionisation – time of flight (MALDI-TOF) mass spectra of a crude polymer sample from a 40 μL polymerization in a 384 well plate (DMA / R2 / ZnTPP = 50 : 1 : 0.01, [DMA] = 1M, t = 5h) were taken on a Bruker ultrafleXtreme. A sample of the polymer (5 μL) was dried *in vacuo*, redissolved in MeCN / H<sub>2</sub>O (50 μL, 1:1 v/v) and mixed with α-cyano-4-hydroxycinnamic acid (5 mg/ml, methanol) before spotting on the MALDI target.

High performance liquid chromatography (HPLC) was used to characterise the degree of functionalization from the DBCO-NH<sub>2</sub> reaction and was performed on a Shimadzu modular system, with a single C-18 reverse phase silica column, using a UV detector at 280nm. Samples were prepared by diluting crude reaction mixture (5 μL) in filtered MeCN / H<sub>2</sub>O (500 μL, 1:1 v/v). A gradient of MeCN / H<sub>2</sub>O (10 – 95% v/v MeCN) over 10 min was used and 5 μL of sample was injected for each run. The peak at ~10 min was integrated relative to a control sample of DBCO-NH<sub>2</sub> at the same concentration but without polymer.

Fourier Transform Infrared (FTIR) spectroscopy was performed on a Bruker Alpha to determine coupling of the Man(OAc)-N<sub>3</sub> to the polymer scaffolds. In these experiments, 25 μL of crude reaction mixture was freeze dried overnight and redissolved in methanol (25 μL). 5 μL of this mixture was deposited on the ATR crystal and the methanol evaporated before recording the spectrum. The signal from the azide was compared to a control sample with the same concentration of Man(OAc)-N<sub>3</sub> but no polymer to give a qualitative assessment of functionalization.

## Tables and Figures

Table S1. DMF-GPC data from kinetic experiments on DMA presented in Figure 2.

| # | Polymer    | RAFT agent | Format                           | [DMA] / [RAFT] | Time (min) | X (%) | $M_n$ theo (g/mol) | $M_n$ GPC (g/mol) | $\bar{D}$ |
|---|------------|------------|----------------------------------|----------------|------------|-------|--------------------|-------------------|-----------|
| 1 | MacroR1    | R1         | Cuvette (+O <sub>2</sub> )       | 50             | 240        | 30    | 1,759              | 1,830             | 1.13      |
| 2 | Chain ext. | MacroR1    | Cuvette (+O <sub>2</sub> )       | 200            | 100        | 78    | 17,223             | 30,500            | 1.03      |
| 3 | Kinetics   | R1         | Cuvette (+O <sub>2</sub> )       | 200            | 200        | 77    | 15,538             | 20,000            | 1.03      |
| 4 | Kinetics   | R1         | Cuvette (-O <sub>2</sub> )       | 200            | 200        | 77    | 15,538             | 19,100            | 1.03      |
| 5 | Kinetics   | R1         | 96 well plate (+O <sub>2</sub> ) | 200            | 120        | 76    | 15,147             | 18,900            | 1.07      |

Table S2. DMF-GPC data from other acrylamide polymerisations presented in Figure 2.

| # | Monomer                                      | RAFT agent | [DMA] / [RAFT] | Time (h) | X (%) | $M_n$ theo (g/mol) | $M_n$ GPC (g/mol) | $\bar{D}$ |
|---|----------------------------------------------|------------|----------------|----------|-------|--------------------|-------------------|-----------|
| 1 | Diacetone acrylamide (DAAm)                  | R2         | 200            | 15       | 94    | 32,100             | 36,900            | 1.11      |
| 2 | <i>N,N</i> -Diethyl acrylamide (DEAm)        | R2         | 200            | 15       | 97    | 24,900             | 24,500            | 1.05      |
| 3 | <i>N</i> -(2-hydroxyethyl) acrylamide (HEAm) | R2         | 200            | 15       | 95    | 22,100             | 35,600            | 1.05      |
| 4 | 4-Acryloylmorpholine (NAM)                   | R2         | 200            | 15       | 100   | 28,500             | 32,600            | 1.04      |
| 5 | <i>N</i> -isopropyl acrylamide (NiPAAm)      | R2         | 200            | 15       | 92    | 21,110             | 32,500            | 1.04      |

**Table S3.** DMF-GPC data from NHS/DMA (1:9) libraries in 96 well plates. [M] = 0.5M, ZnTPP / RAFT = 0.01, 150 $\mu$ L, 16h.

| #  | RAFT agent | Structure | DP <sub>target</sub><br>(Total) | M <sub>n</sub> theo<br>(g/mol) | M <sub>n</sub> GPC<br>(g/mol) | $\bar{D}$ |
|----|------------|-----------|---------------------------------|--------------------------------|-------------------------------|-----------|
| 1  | R2         | Linear    | 20                              | 2,311                          | 2,370                         | 1.24      |
| 2  | R2         | Linear    | 40                              | 4,349                          | 4,500                         | 1.27      |
| 3  | R2         | Linear    | 80                              | 8,427                          | 7,700                         | 1.23      |
| 4  | R2         | Linear    | 160                             | 16,582                         | 13,600                        | 1.20      |
| 5  | R2         | Linear    | 320                             | 32,892                         | 23,550                        | 1.11      |
| 6  | R2         | Linear    | 640                             | 65,511                         | 23,260                        | 1.07      |
| 7  | R3         | 3 arm     | 20                              | 2,700                          | 3,640                         | 1.25      |
| 8  | R3         | 3 arm     | 40                              | 4,738                          | 7,350                         | 1.32      |
| 9  | R3         | 3 arm     | 80                              | 8,816                          | 13,180                        | 1.23      |
| 10 | R3         | 3 arm     | 160                             | 16,971                         | 23,080                        | 1.26      |
| 11 | R3         | 3 arm     | 320                             | 33,280                         | 33,760                        | 1.32      |
| 12 | R3         | 3 arm     | 640                             | 65,900                         | 43,920                        | 1.35      |
| 13 | R4         | 4 arm     | 20                              | 2,894                          | 5,980                         | 1.31      |
| 14 | R4         | 4 arm     | 40                              | 4,933                          | 11,260                        | 1.50      |
| 15 | R4         | 4 arm     | 80                              | 9,010                          | 19,720                        | 1.45      |
| 16 | R4         | 4 arm     | 160                             | 17,165                         | 31,350                        | 1.43      |
| 17 | R4         | 4 arm     | 320                             | 33,475                         | 42,630                        | 1.37      |
| 18 | R4         | 4 arm     | 640                             | 66,094                         | 65,000                        | 1.25      |

Note: Theoretical molecular weights ( $M_n$  theo) are calculated at X=100% on the assumption that NHS has completely reacted with butyl amine.

**Table S4.** DMF-GPC data from NHS/DMA libraries in Table S3 before and after clicking with PEG<sub>7</sub>-N<sub>3</sub>

| # | Structure | RAFT agent | DP <sub>target</sub><br>(Total) | Before PEG                     |                               |           | After PEG                      |                               |           |
|---|-----------|------------|---------------------------------|--------------------------------|-------------------------------|-----------|--------------------------------|-------------------------------|-----------|
|   |           |            |                                 | M <sub>n</sub> theo<br>(g/mol) | M <sub>n</sub> GPC<br>(g/mol) | $\bar{D}$ | M <sub>n</sub> theo<br>(g/mol) | M <sub>n</sub> GPC<br>(g/mol) | $\bar{D}$ |
| 1 | 3 arm     | R3         | 20                              | 2700                           | 3640                          | 1.25      | 3813                           | 6010                          | 1.25      |
| 2 | 4 arm     | R4         | 20                              | 2894                           | 5980                          | 1.31      | 4007                           | 11310                         | 1.26      |
| 3 | Linear    | R2         | 40                              | 4349                           | 4500                          | 1.27      | 6576                           | 8620                          | 1.08      |
| 4 | 3 arm     | R3         | 40                              | 4738                           | 7350                          | 1.32      | 6965                           | 11590                         | 1.22      |
| 5 | 4 arm     | R4         | 40                              | 4933                           | 11260                         | 1.50      | 7159                           | 18800                         | 1.29      |
| 6 | Linear    | R2         | 80                              | 8427                           | 7700                          | 1.23      | 12880                          | 12410                         | 1.11      |
| 7 | 3 arm     | R3         | 80                              | 8816                           | 13180                         | 1.23      | 13269                          | 30800                         | 1.46      |
| 8 | 4 arm     | R4         | 80                              | 9010                           | 19720                         | 1.45      | 13464                          | 20720                         | 1.21      |

**Table S5.** DMF-GPC data from NHS/DMA libraries in 96 well plates. [M] = 1.0M, ZnTPP / RAFT = 0.01, 150 $\mu$ L, 5h.

| #  | RAFT agent | Structure | NHS / DMA | DP <sub>target</sub> (Total) | M <sub>n</sub> theo (g/mol) | M <sub>n</sub> GPC (g/mol) | $\bar{D}$ |
|----|------------|-----------|-----------|------------------------------|-----------------------------|----------------------------|-----------|
| 1  | R2         | Linear    | 1:9       | 60                           | 6388                        | 6500                       | 1.16      |
| 2  | R2         | Linear    | 1:9       | 120                          | 12504                       | 10360                      | 1.19      |
| 3  | R2         | Linear    | 1:9       | 240                          | 24737                       | 18700                      | 1.18      |
| 4  | R2         | Linear    | 1:9       | 480                          | 49201                       | 24760                      | 1.17      |
| 5  | R2         | Linear    | 1:9       | 960                          | 98131                       | 28500                      | 1.22      |
| 6  | R3         | 3-arm     | 1:9       | 60                           | 6777                        | 8240                       | 1.30      |
| 7  | R3         | 3-arm     | 1:9       | 120                          | 12893                       | 18720                      | 1.44      |
| 8  | R3         | 3-arm     | 1:9       | 240                          | 25126                       | 29850                      | 1.41      |
| 9  | R3         | 3-arm     | 1:9       | 480                          | 49590                       | 51490                      | 1.36      |
| 10 | R3         | 3-arm     | 1:9       | 960                          | 98520                       | 64500                      | 1.41      |
| 11 | R3         | 3-arm     | 2:8       | 60                           | 6945                        | 8810                       | 1.24      |
| 12 | R3         | 3-arm     | 2:8       | 120                          | 13230                       | 17070                      | 1.21      |
| 13 | R3         | 3-arm     | 2:8       | 240                          | 25799                       | 30730                      | 1.15      |
| 14 | R3         | 3-arm     | 2:8       | 480                          | 50937                       | 45600                      | 1.19      |
| 15 | R3         | 3-arm     | 2:8       | 960                          | 101213                      | 86550                      | 1.17      |
| 16 | R4         | 4-arm     | 1:9       | 60                           | 6971                        | 7350                       | 1.34      |
| 17 | R4         | 4-arm     | 1:9       | 120                          | 13088                       | 16650                      | 1.51      |
| 18 | R4         | 4-arm     | 1:9       | 240                          | 25320                       | 30880                      | 1.46      |
| 19 | R4         | 4-arm     | 1:9       | 480                          | 49785                       | 46310                      | 1.54      |
| 20 | R4         | 4-arm     | 1:9       | 960                          | 98714                       | 74610                      | 1.48      |
| 21 | R4         | 4-arm     | 2:8       | 60                           | 7140                        | 6260                       | 1.30      |
| 22 | R4         | 4-arm     | 2:8       | 120                          | 13424                       | 14570                      | 1.28      |
| 23 | R4         | 4-arm     | 2:8       | 240                          | 25993                       | 26480                      | 1.25      |
| 24 | R4         | 4-arm     | 2:8       | 480                          | 51131                       | 39230                      | 1.41      |
| 25 | R4         | 4-arm     | 2:8       | 960                          | 101408                      | 75360                      | 1.30      |

Note: Theoretical molecular weights (**M<sub>n</sub> theo**) are calculated at X=100% on the assumption that NHS has completely reacted with butyl amine.



**Table S6.** DMF-GPC data from NHS/DMA libraries in 96 well plates used to characterise the efficiency of the post-polymerisation modifications.  $[M] = 0.5M$ , ZnTPP / RAFT = 0.02, 150 $\mu$ L, 16h.

| # | RAFT agent | Structure | NHS / DMA | DP <sub>target</sub> (Total) | M <sub>n</sub> theo (g/mol) | M <sub>n</sub> GPC (g/mol) | $\bar{D}$ |
|---|------------|-----------|-----------|------------------------------|-----------------------------|----------------------------|-----------|
| 1 | R2         | Linear    | 1:9       | 60                           | 6388                        | 18810                      | 1.39      |
| 2 | R2         | Linear    | 1:9       | 120                          | 12504                       | 26410                      | 1.45      |
| 3 | R2         | Linear    | 1:9       | 240                          | 24737                       | 31530                      | 1.58      |
| 4 | R2         | Linear    | 1:9       | 480                          | 49201                       | 38540                      | 1.43      |
| 5 | R2         | Linear    | 1:9       | 960                          | 98131                       | 48920                      | 1.38      |
| 6 | R3         | 3-arm     | 1:9       | 60                           | 6777                        | 17510                      | 1.38      |
| 7 | R4         | 4-arm     | 1:9       | 60                           | 6971                        | 16060                      | 1.42      |
| 8 | R3         | 3-arm     | 2:8       | 60                           | 6945                        | 20970                      | 1.39      |
| 9 | R4         | 4-arm     | 2:8       | 60                           | 7140                        | 13240                      | 1.54      |

Note: Theoretical molecular weights ( $M_n$  theo) are calculated at X=100% on the assumption that NHS has completely reacted with butyl amine.

**Table S7.** DMF-GPC data from DBCO/DMA polymerisations in 384 well plates, conducted at 1M monomer concentration with 9:1 (mol/mol) NHS/DMA and subsequently reacted with 1 equiv / NHS DBCO-NH<sub>2</sub> in the presence of 1 equiv / NHS DMAP. Theoretical molecular weights are calculated at X=100%. The corresponding GPC molecular weight distributions are shown in Figure S9a

| #  | RAFT agent | Structure | DP <sub>target</sub> (Total) | M <sub>n</sub> theo (g/mol) | M <sub>n</sub> GPC (g/mol) | $\bar{D}$ |
|----|------------|-----------|------------------------------|-----------------------------|----------------------------|-----------|
| 1  | R3         | 3 arm     | 60                           | 6,777                       | 3,520                      | 1.15      |
| 2  | R3         | 3 arm     | 120                          | 12,893                      | 8,290                      | 1.17      |
| 3  | R3         | 3 arm     | 240                          | 25,126                      | 15,380                     | 1.18      |
| 4  | R3         | 3 arm     | 480                          | 49,590                      | 28,470                     | 1.12      |
| 5  | R3         | 3 arm     | 960                          | 98,520                      | 41,990                     | 1.17      |
| 6  | R4         | 4 arm     | 80                           | 9,010                       | 7,650                      | 1.17      |
| 7  | R4         | 4 arm     | 160                          | 17,165                      | 13,970                     | 1.24      |
| 8  | R4         | 4 arm     | 320                          | 33,475                      | 20,160                     | 1.35      |
| 9  | R4         | 4 arm     | 640                          | 66,094                      | 31,980                     | 1.30      |
| 10 | R4         | 4 arm     | 1280                         | 131,333                     | 39,200                     | 1.38      |

**Table S8.** DMF-GPC data from DBCO/DMA polymerisations in 384 well plates, conducted at 0.5M monomer concentration with 9:1 (mol/mol) NHS/DMA and subsequently reacted with 1 eq. / NHS DBCO-NH<sub>2</sub> in the presence of 1 eq. / NHS DMAP and then with 1 eq./NHS Man(OAc)-N<sub>3</sub>. Theoretical molecular weights are calculated at X = 100%. The corresponding GPC molecular weight distributions are shown in Figure S9b

| #  | RAFT agent | Structure | DP <sub>target</sub><br>(Total) | M <sub>n</sub> theo<br>(g/mol) | M <sub>n</sub> GPC<br>(g/mol) | D    |
|----|------------|-----------|---------------------------------|--------------------------------|-------------------------------|------|
| 1  | R2         | Linear    | 25                              | 2,820                          | 4,730                         | 1.04 |
| 2  | R2         | Linear    | 80                              | 8,427                          | 9,880                         | 1.12 |
| 3  | R2         | Linear    | 100                             | 10,466                         | 20,090                        | 1.10 |
| 4  | R2         | Linear    | 200                             | 20,659                         | 28,610                        | 1.15 |
| 5  | R3         | 3 arm     | 80                              | 8,816                          | 11,280                        | 1.17 |
| 6  | R3         | 3 arm     | 100                             | 10,855                         | 22,260                        | 1.17 |
| 7  | R3         | 3 arm     | 200                             | 21,048                         | 37,410                        | 1.22 |
| 8  | R3         | 3 arm     | 400                             | 41,435                         | 52,020                        | 1.28 |
| 9  | R4         | 4 arm     | 80                              | 9,010                          | 16,110                        | 1.22 |
| 10 | R4         | 4 arm     | 100                             | 11,049                         | 20,570                        | 1.22 |
| 11 | R4         | 4 arm     | 200                             | 21,242                         | 36,330                        | 1.33 |
| 12 | R4         | 4 arm     | 400                             | 41,630                         | 43,980                        | 1.38 |

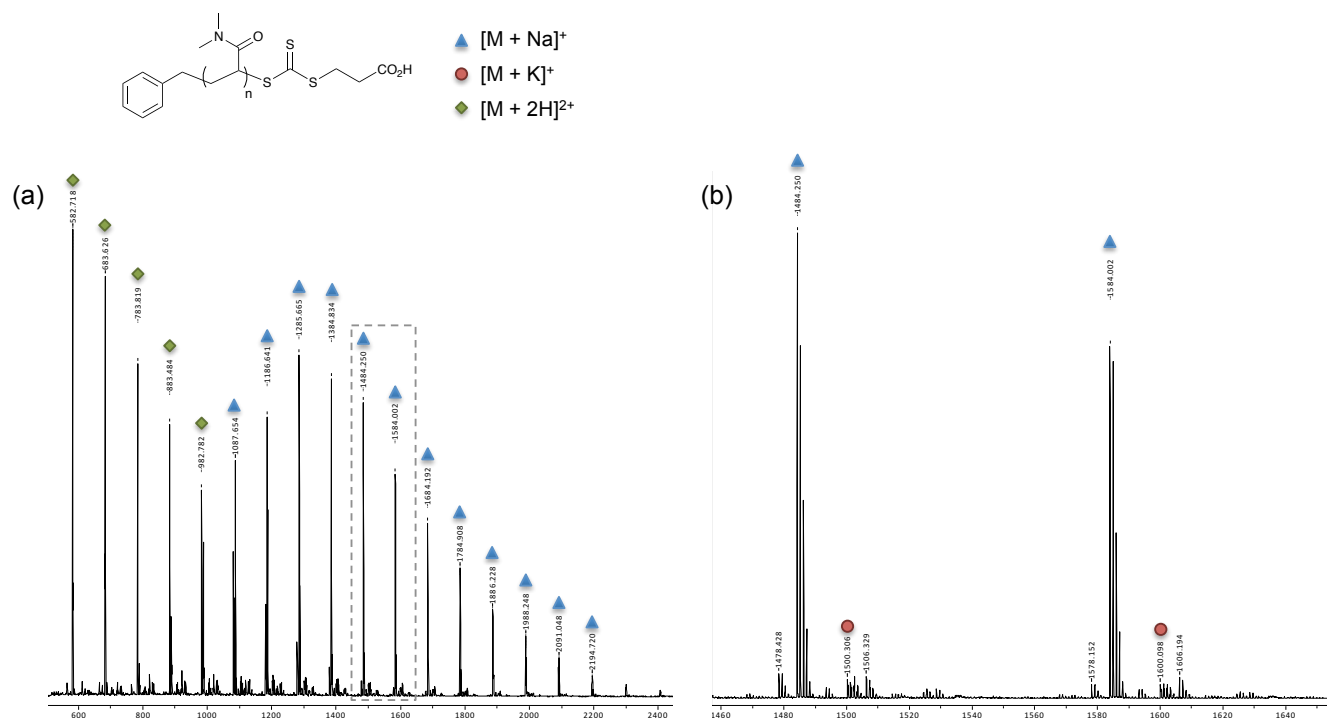

**Figure S1.** MALDI-TOF spectrum of pDMA synthesised in the 40  $\mu$ L format by polymerising DMA / **R2** / ZnTPP (50 : 1 : 0.01) under standard conditions at a monomer concentration of 1 M for 5 h. After removal of the DMSO the crude polymer was diluted in 1:1 (v/v) H<sub>2</sub>O / MeCN and mixed with CHCA (5 mg/mL) as a matrix before spotting on the MALDI plate. PEG monomethyl ether ( $M_n = 1100$  Da) was used as the calibration standard.

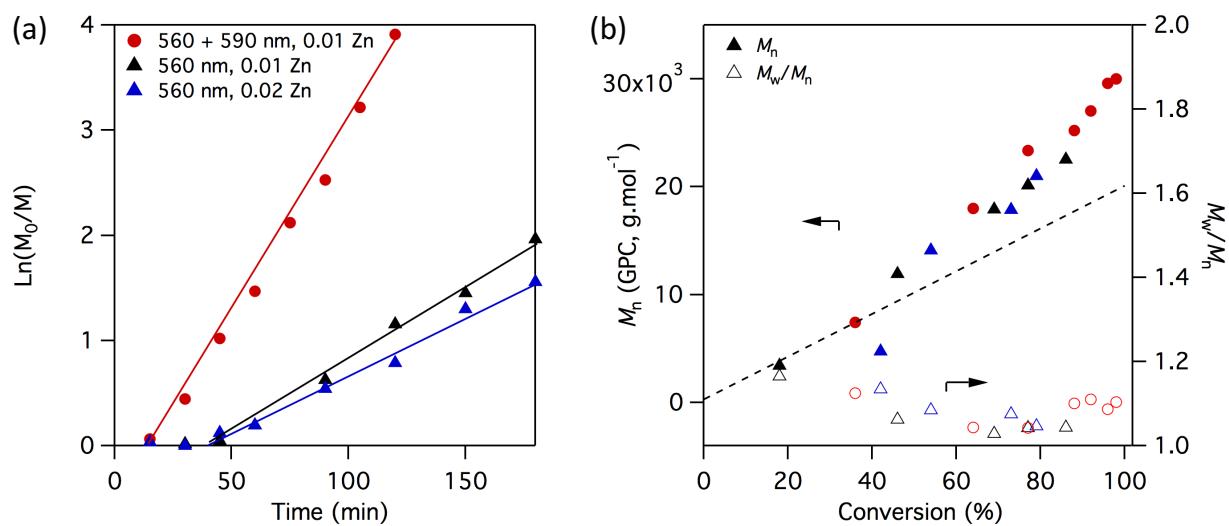

**Figure S2.** Comparison of a) kinetics and b) resulting molecular weights and dispersities as measured by DMF-GPC from DMA 200 polymerisations in 96 well plates. Irradiation was supplied by either the 560 nm LEDs alone or by both the 560 + 2 x 590 nm LEDs showing higher speed with the higher intensity light.

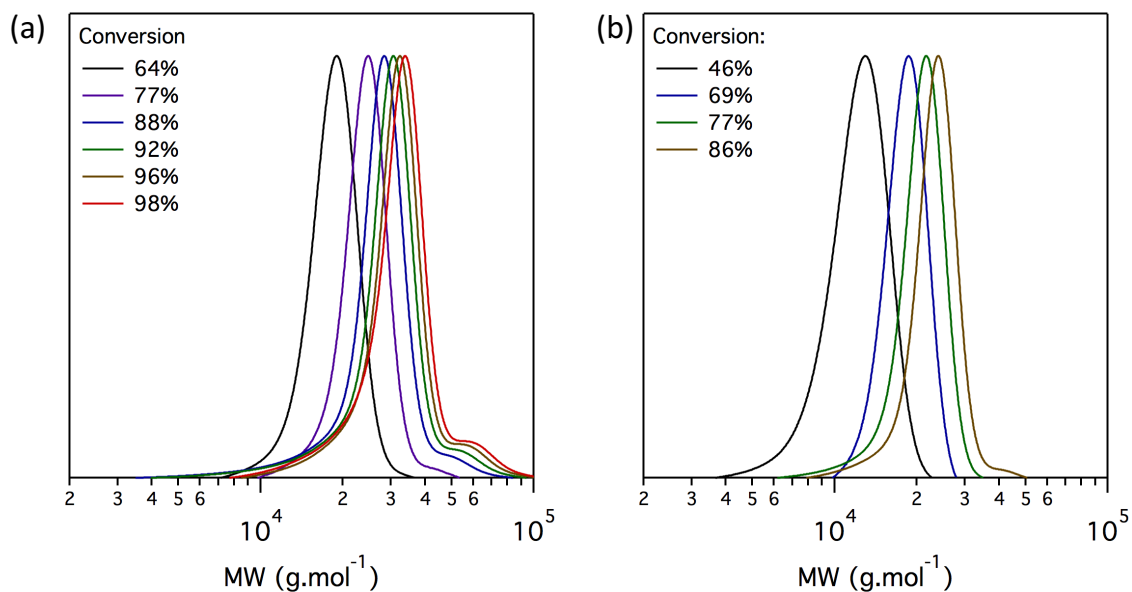

**Figure S3.** DMF-GPC traces from the above pDMA200 kinetic experiments showing the shoulder that forms at high conversions with the higher intensity light source. a)  $\lambda = 560 \text{ nm} + 2 \times 590 \text{ nm}$  LEDs, b)  $\lambda = 560 \text{ nm}$  LEDs only.

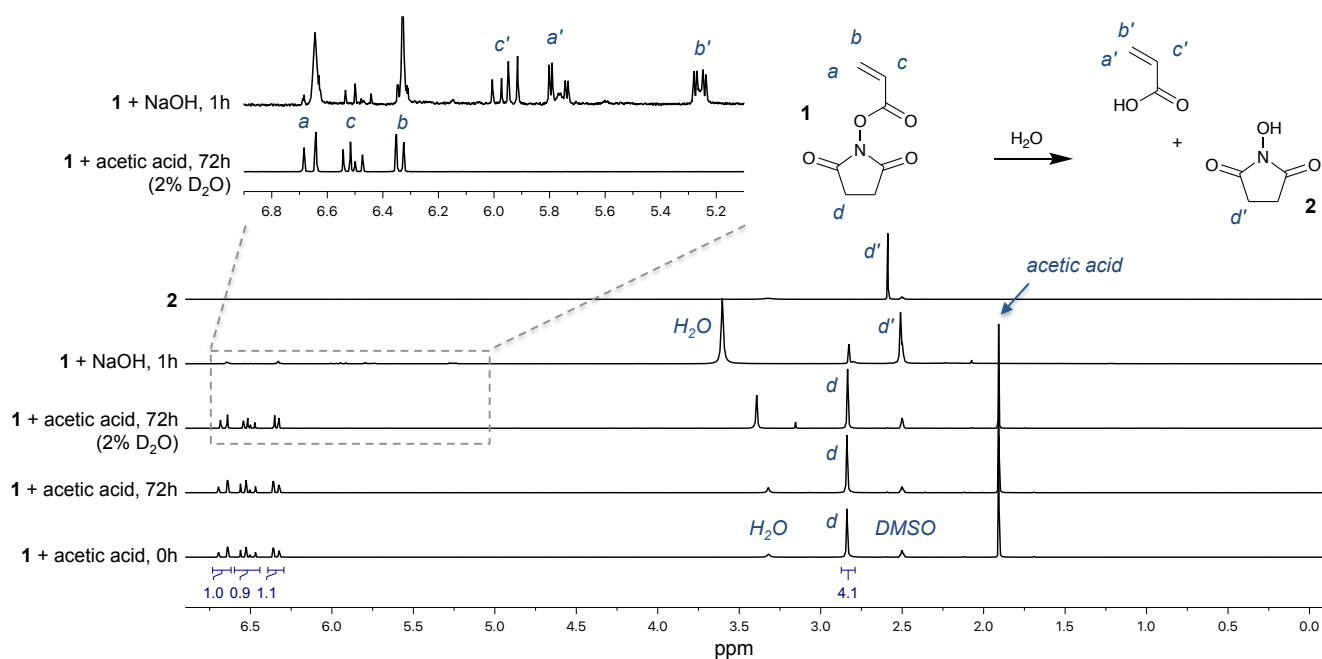

**Figure S4.**  $^1\text{H-NMR}$  (in  $\text{DMSO-}d_6$ ) of NHS acrylate (**1**, 10 mg/mL) before and after hydrolysis to acrylic acid and *N*-hydroxysuccinimide (**2**) showing no hydrolysis in the presence of acetic acid (1 equiv) and  $\text{D}_2\text{O}$  (2% v/v) after 72h, and hydrolysis with NaOH in the absence of acetic acid. Integrals are shown for the first spectrum and are representative of the first three traces.

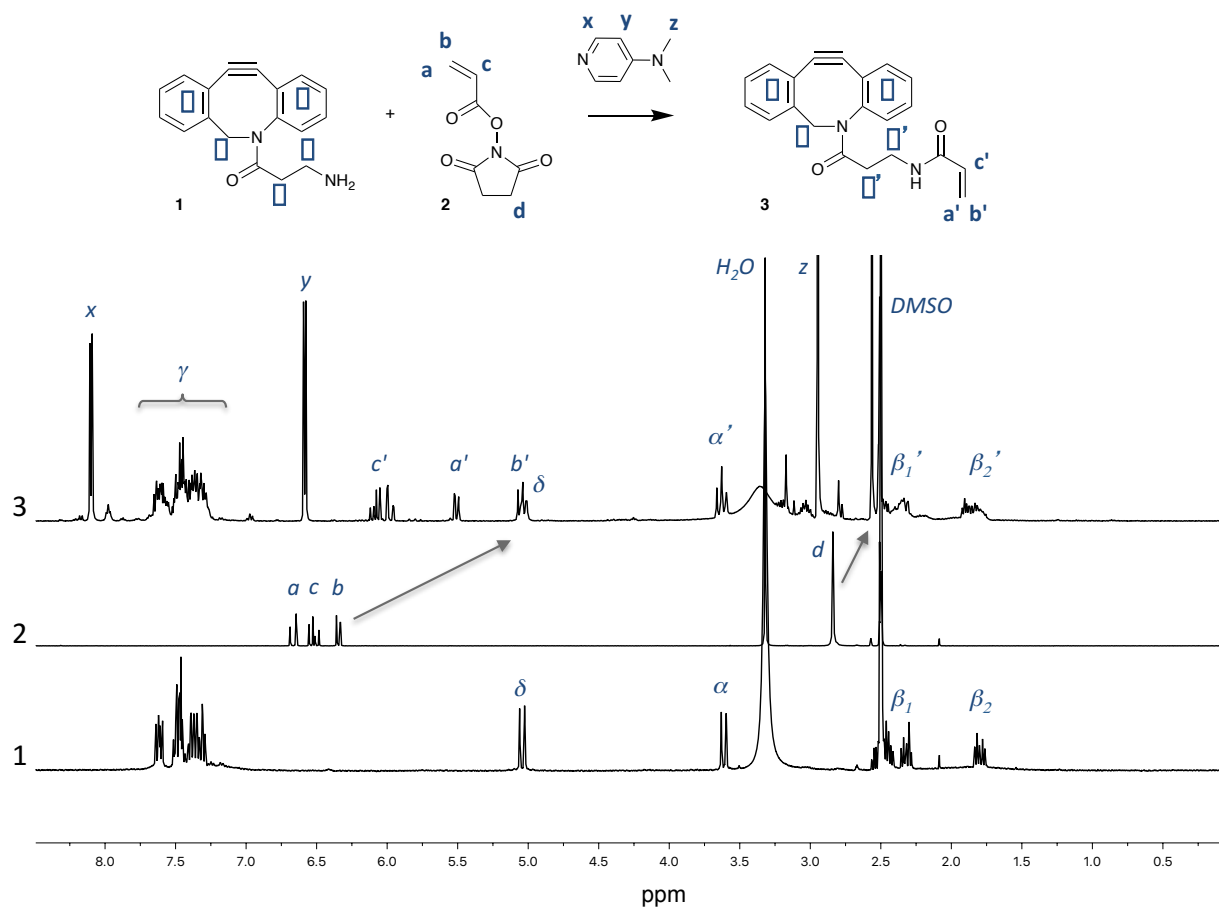

**Figure S5.** <sup>1</sup>H-NMR (in DMSO-*d*<sub>6</sub>) of DBCO-NH<sub>2</sub> (1) and NHS acrylate (2) before and after mixing with dimethyl amino pyridine in a 1:1:1 molar ratio (3) showing click of the DBCO to the acrylate.

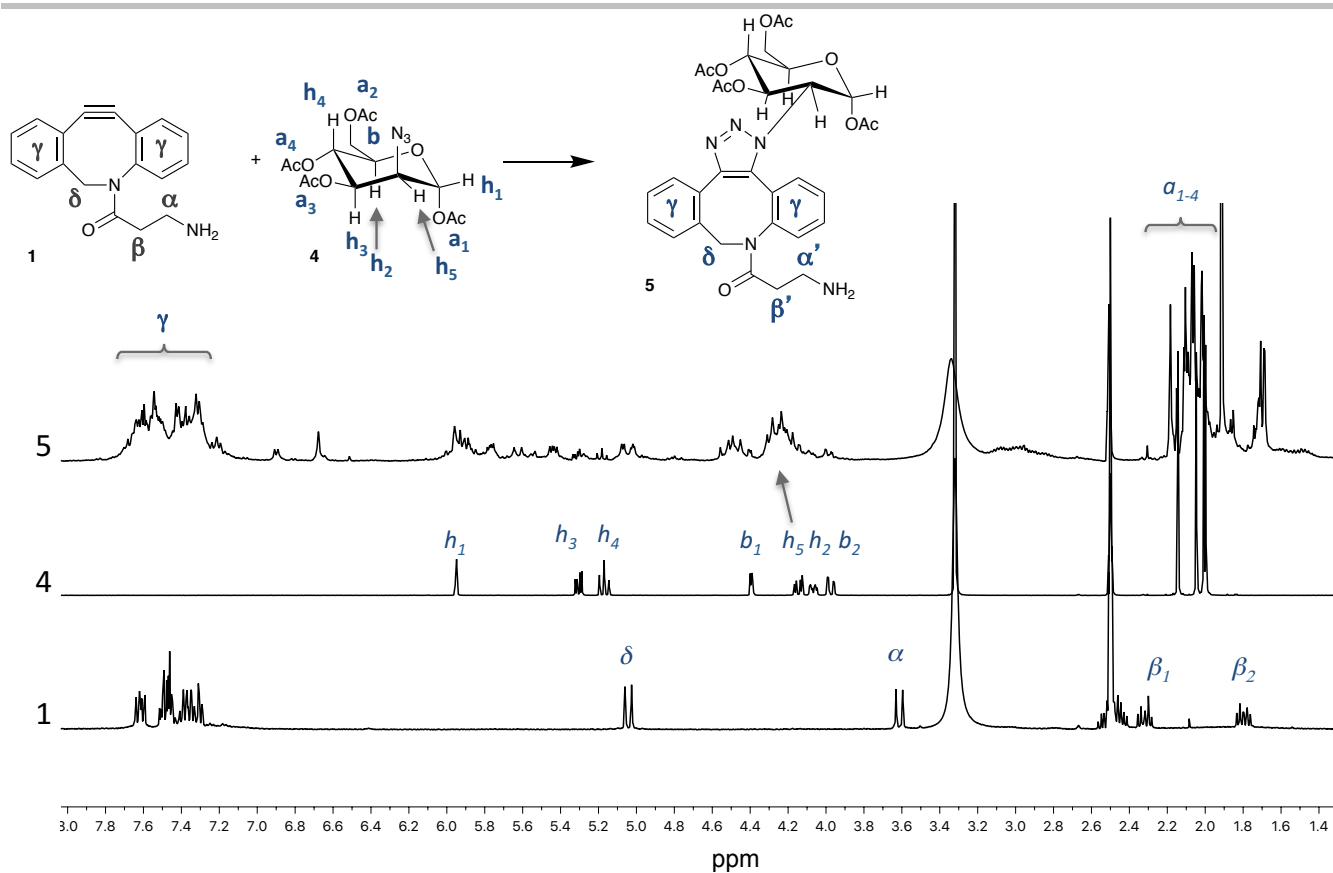

**Figure S6.**  $^1\text{H-NMR}$  (in  $\text{DMSO-}d_6$ ) of DBCO- $\text{NH}_2$  (**1**) and azido-mannose (OAc) (**4**) before and after mixing in a 1:1 molar ratio (**5**) showing click of the mannose to the cyclooctyne.

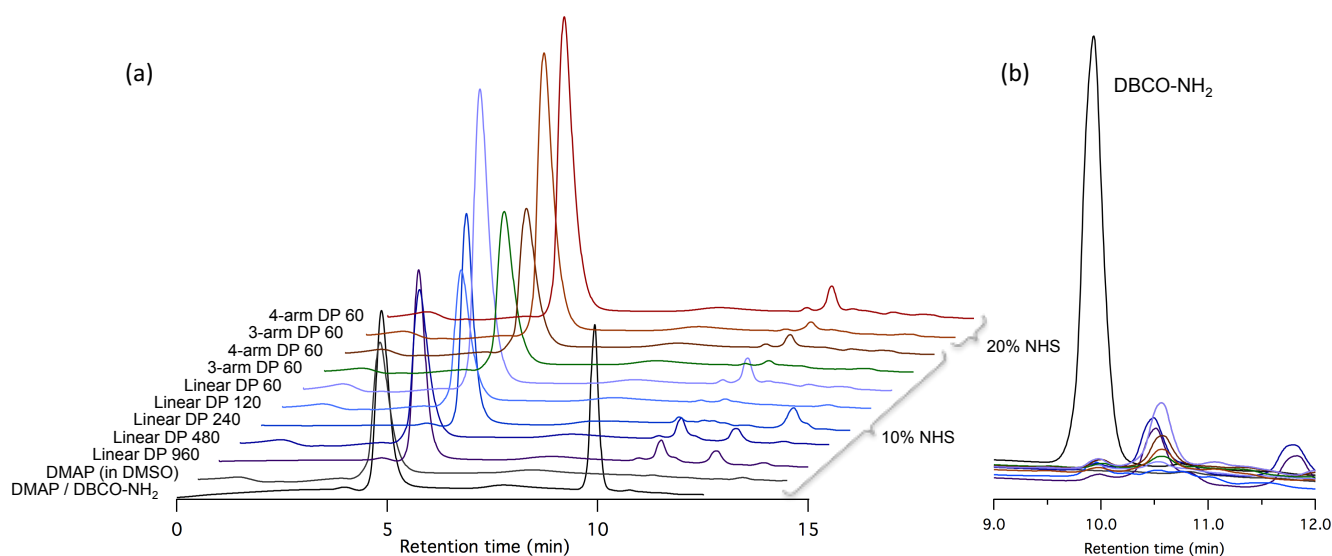

**Figure S7.** HPLC chromatograms of DBCO- $\text{NH}_2$  before and after reaction with linear polymer scaffolds (target DP = 60-960) as well as 3-arm and 4-arm scaffolds (target DP = 60) prepared with 10% and 20% (mol) NHS acrylate / DMA in a 150  $\mu\text{L}$  0.5 M well plate polymerisation. Post-polymerisation modification reactions were conducted with DBCO- $\text{NH}_2$  (1 equiv / NHS) in the presence of DMAP (1 equiv / NHS) for 6 h at RT. The DBCO- $\text{NH}_2$  trace shows the concentration of DBCO- $\text{NH}_2$  used in the reactions on scaffolds with 10% NHS acrylate. The HPLC was run with a linear gradient of 10-95% (v/v) MeCN /  $\text{H}_2\text{O}$  (0.1% TFA) over the first 10 min, before flushing for 2 min at 95% MeCN. a) Full chromatogram, with DMSO, polymer and DMAP eluting at  $\sim 5$  min. b) Zoom in on the 9-12 min region, showing the consumption of DBCO- $\text{NH}_2$  in all postmodification reactions.

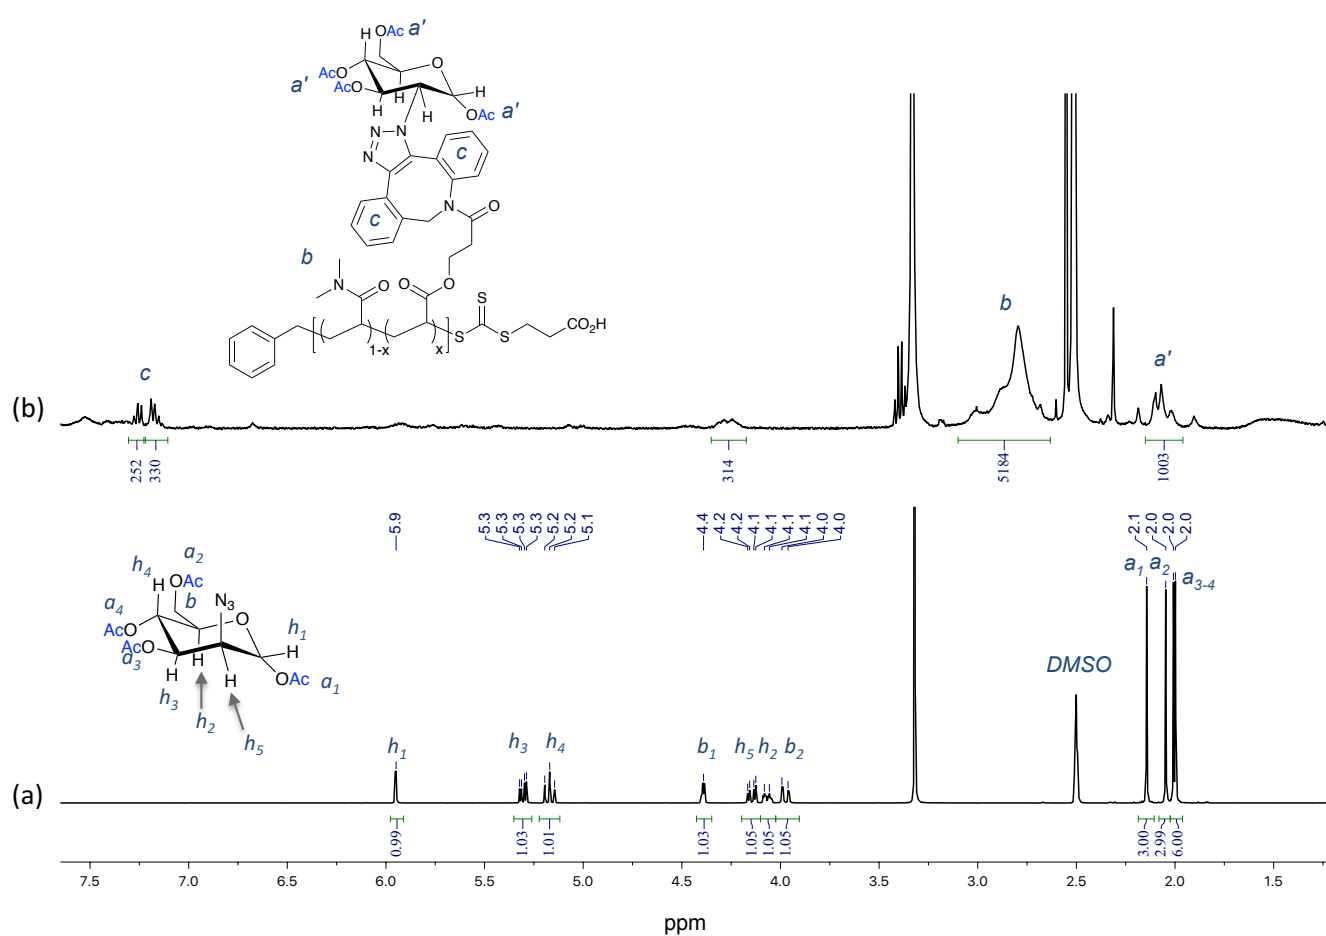

**Figure S8.** <sup>1</sup>H-NMR (in DMSO-*d*<sub>6</sub>) of a) protected azido mannose and; b) a linear pDMA scaffold (target DP 960, polymerised overnight at 0.5M) bearing 10% (mol) NHS acrylate after post-polymerisation modification with DBCO-NH<sub>2</sub> and azido mannose and purification by precipitation twice in diethyl ether. The DBCO and mannose protecting groups are visible in the final polymer and integrate to approximately 10% (mol) relative to the methyl groups in the pDMA.

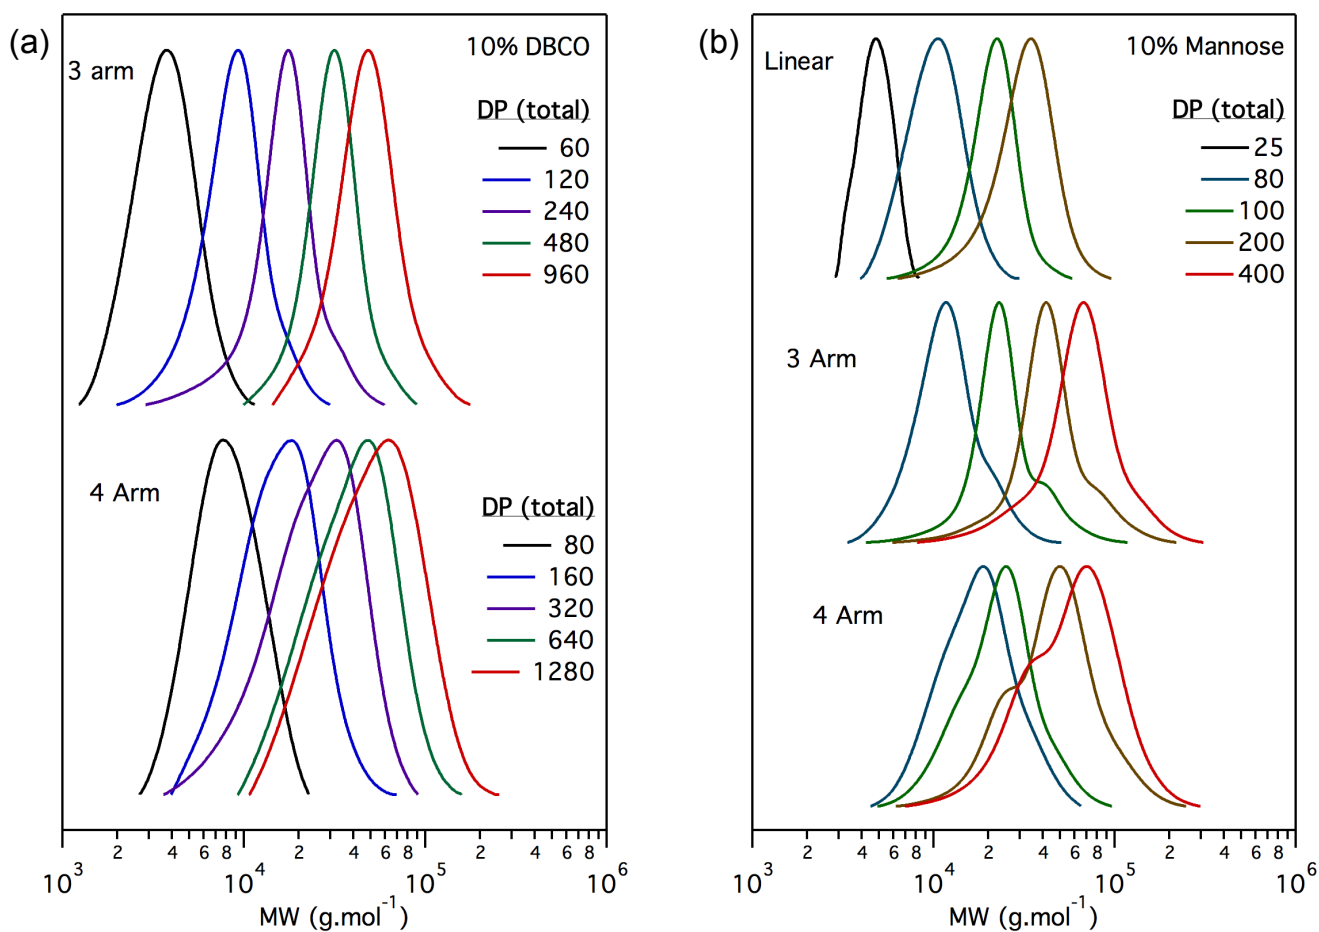

**Figure S9.** GPC molecular weight distributions for polymer libraries prepared in 40  $\mu\text{L}$  reaction volumes on 384 well plates. a) 3-arm and 4-arm architectures, synthesised at 1M monomer concentration, after functionalization with DBCO- $\text{NH}_2$ . b) Linear, 3-arm and 4-arm architectures synthesised at 0.5M monomer concentration, after functionalization with DBCO- $\text{NH}_2$  and then clicked to Man(OAc)- $\text{N}_3$ . The corresponding GPC data are shown in Tables S7-8.

DOI: 10.1002/anie.2016XXXXX
